# Supplementary material for: Evaluation of effectiveness and safety of short term low fat ketogenic diet in the reduction of fat mass in patients over 40 years old
Source: Research Square preprint supplement (doi:10.21203/rs.3.rs-2851251/v1), 2023-05-12
Supplement: Supplementary file 1 [file 2ae53abfbf5b7966dbef9d79.docx]

**Contributions to the literature**

• There are numerous articles about how a high-fat ketogenic diet can help reduce body weight, but there isn't enough information available about how effective and safe a low-fat ketogenic diet is for achieving the same goal.

• Both groups experienced a significant decrease in body mass index (BMI), fat mass, and chest, waist, and hip circumference after undergoing ketogenic therapy, according to statistical analysis.

• A low-carbohydrate ketogenic diet for a short duration appears to be highly effective in reducing fat mass in individuals, regardless of whether they are over or under the age of 40.
